# Supplementary material
Source: PubMed Central journal article supplement (PMC4097605)

Tongue (50x)

Lymph node (50x)

mHGF

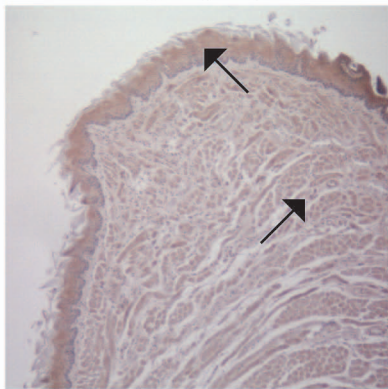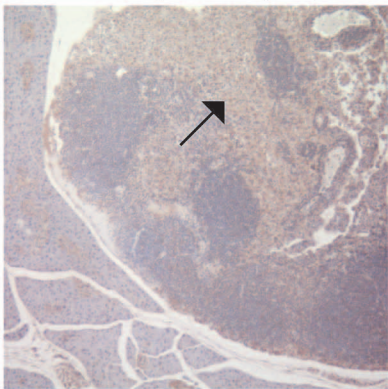

isotype control

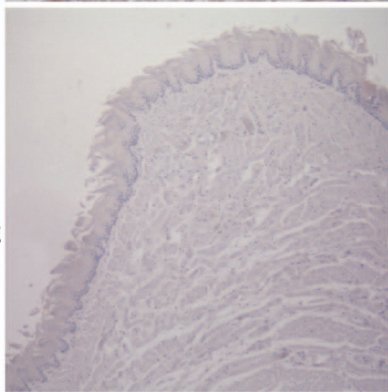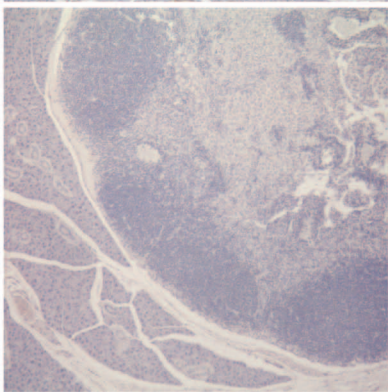

Supplement: NIHMS535244-supplement-1.pdf [file NIHMS535244-supplement-1.pdf]

Tongue (200x)

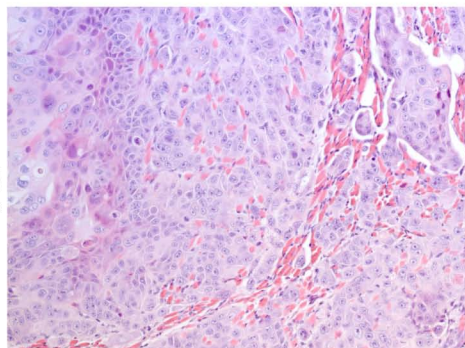

Lymph node (400x)

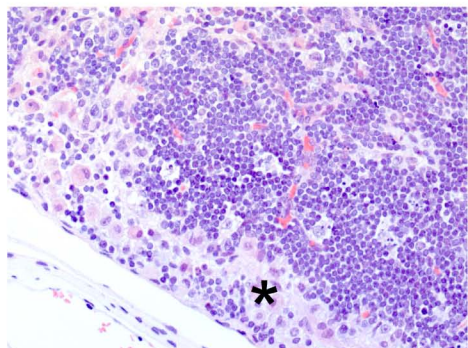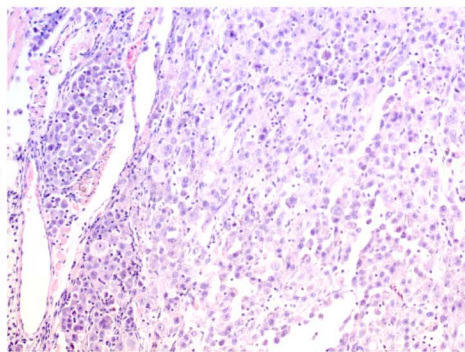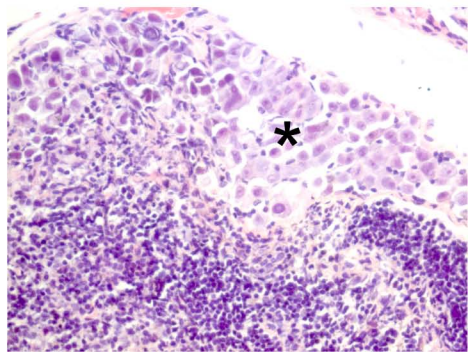

Supplement: NIHMS535244-supplement-2.pdf [file NIHMS535244-supplement-2.pdf]

XT Supplemental Figure 3

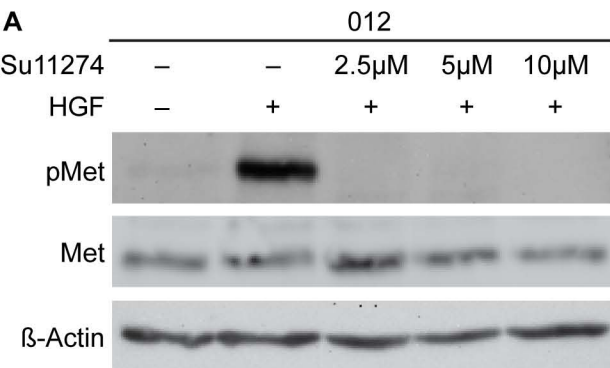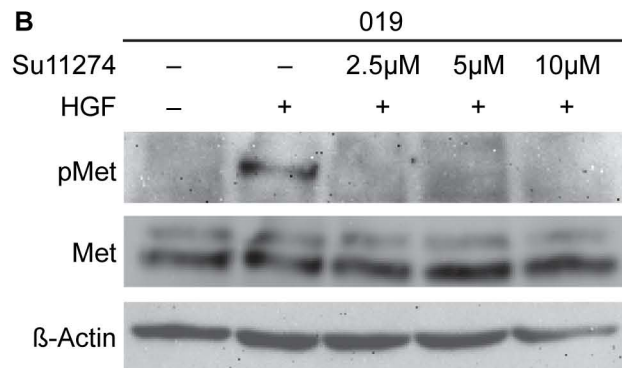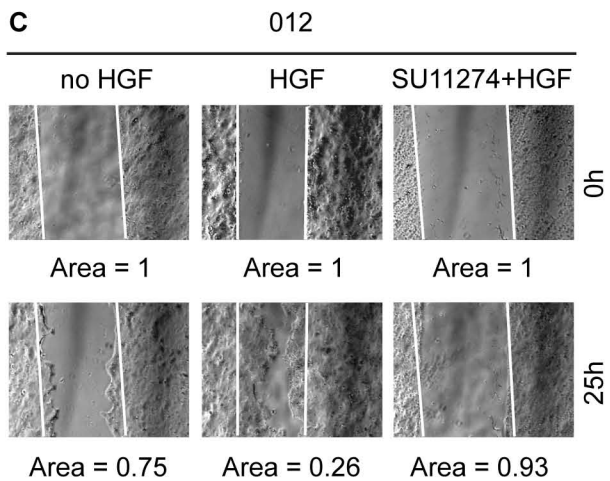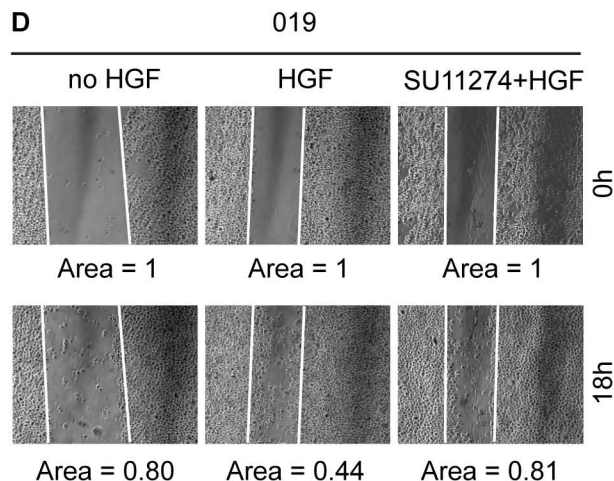

Supplement: NIHMS535244-supplement-3.pdf [file NIHMS535244-supplement-3.pdf]

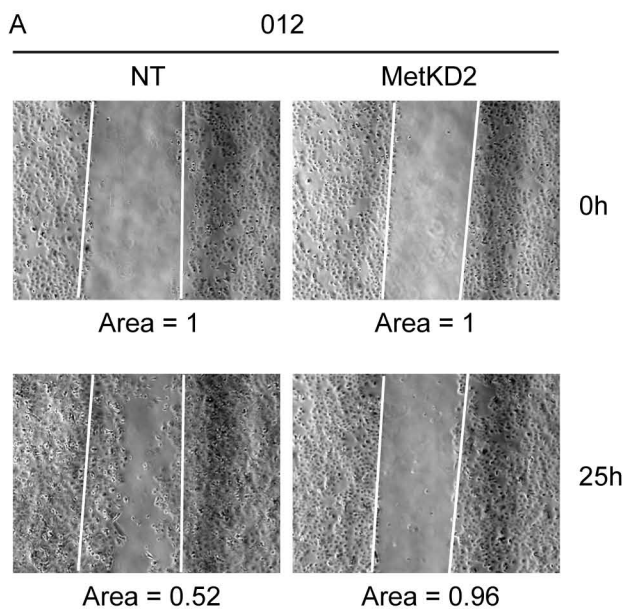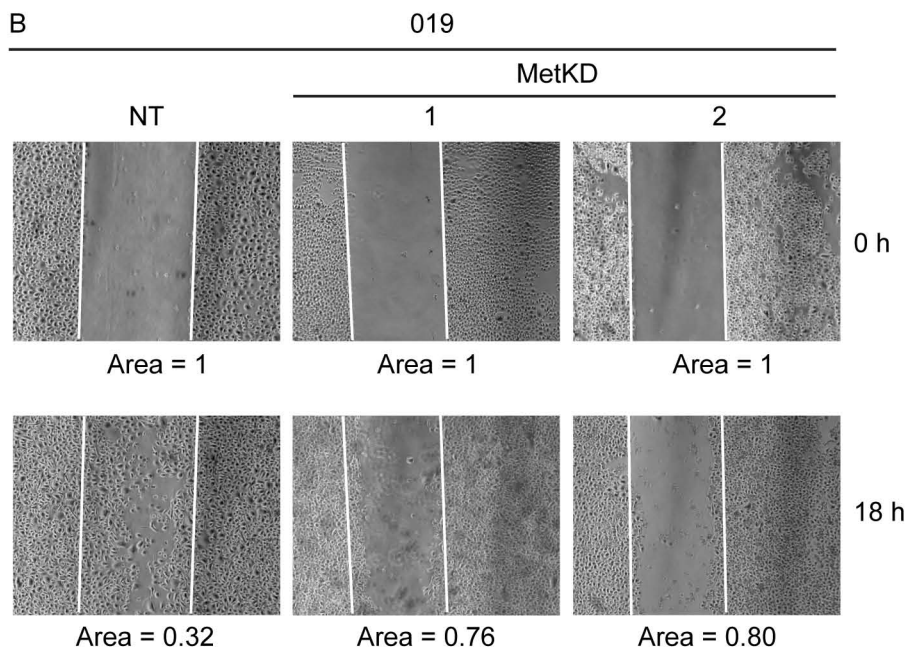

Supplement: NIHMS535244-supplement-4.pdf [file NIHMS535244-supplement-4.pdf]

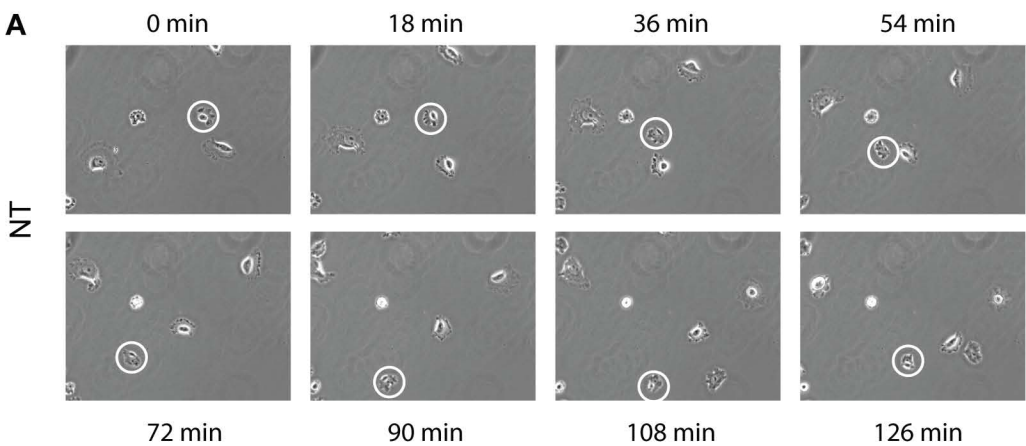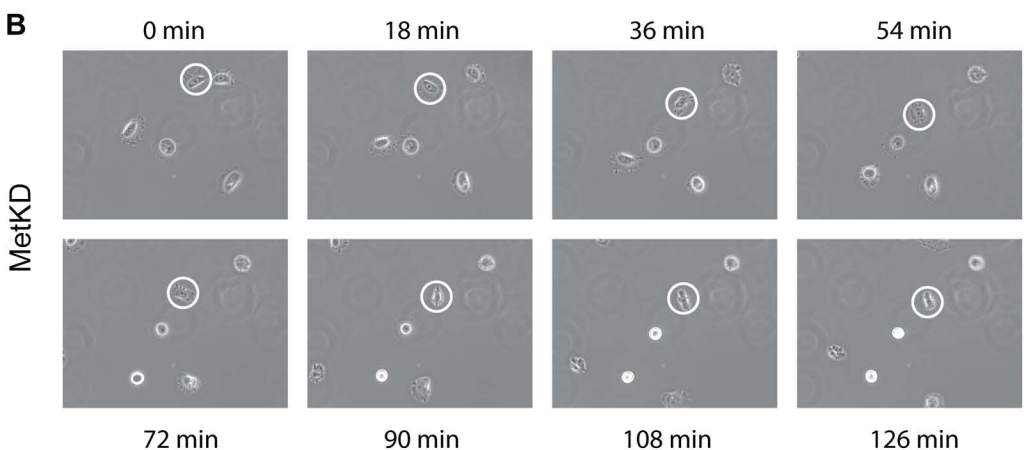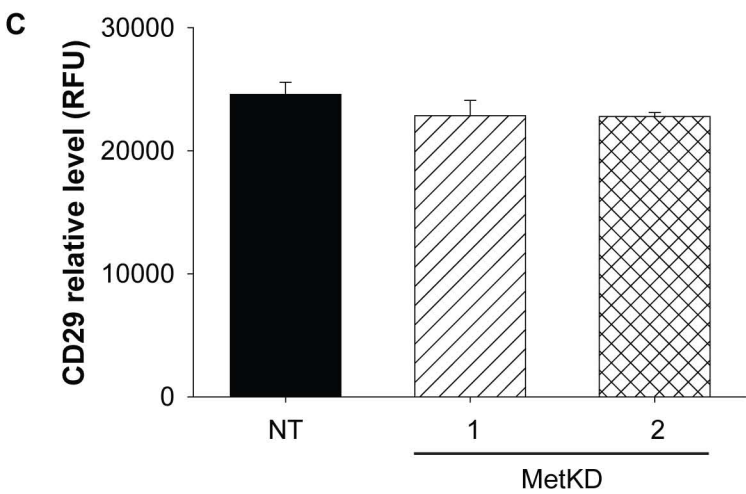

Supplement: NIHMS535244-supplement-5.pdf [file NIHMS535244-supplement-5.pdf]
